# Supplementary material for: miR-197-3p Promotes Osteosarcoma Stemness and Chemoresistance by Inhibiting SPOPL
Source: MDPI journal article supplement (doi:10.3390/jcm12031177), 2023-02-01
Supplement: s1 [file s1]

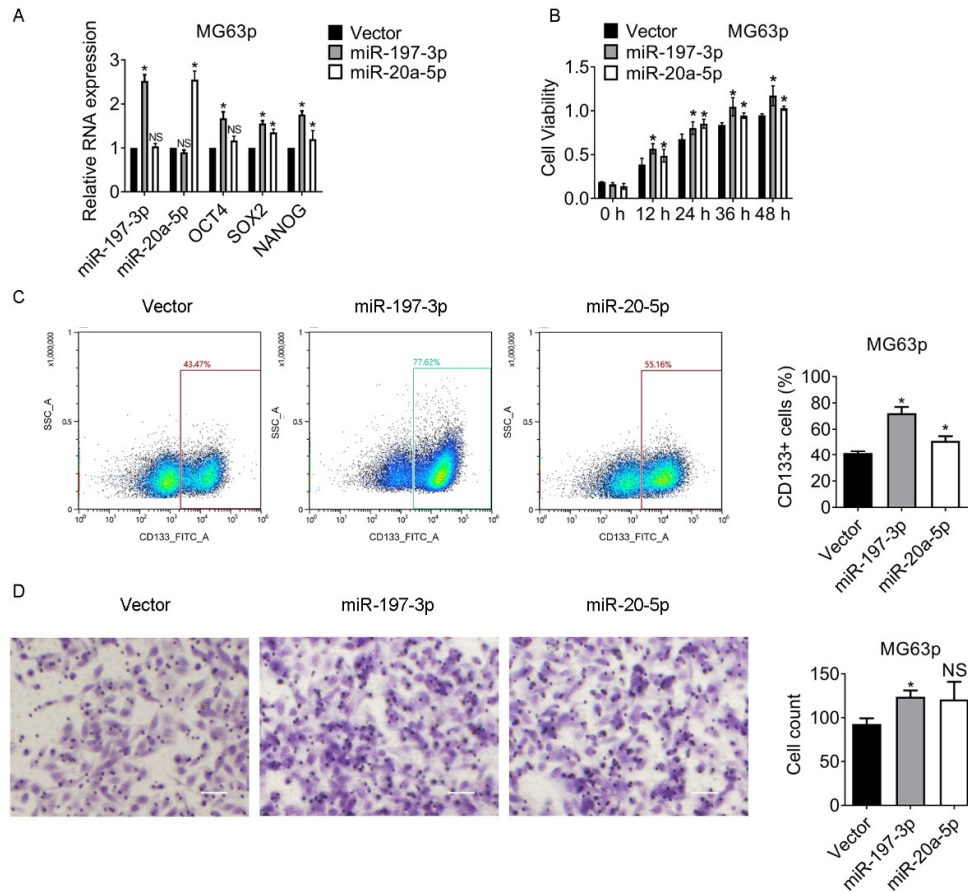

**Supplementary Figure 1. miR-197-3p and miR-20a-5p promote chemoresistance and stemness of MTX-resistant MG63 cells.** (A) The indicated miRNAs expression in the cell lines was assessed by qPCR assay. (B) The viability of the indicated cells was measured using MTT assays. (C) The quantity of CD133+ cells was then measured using flow cytometry. (D) The migration of the cells was assessed by transwell assay. Magnification, 200x. \* $P < 0.05$ ; NS, no significance. U2OSp, the parental U2OS; MG63p, the parental MG63. MG63p, the parental MG63.

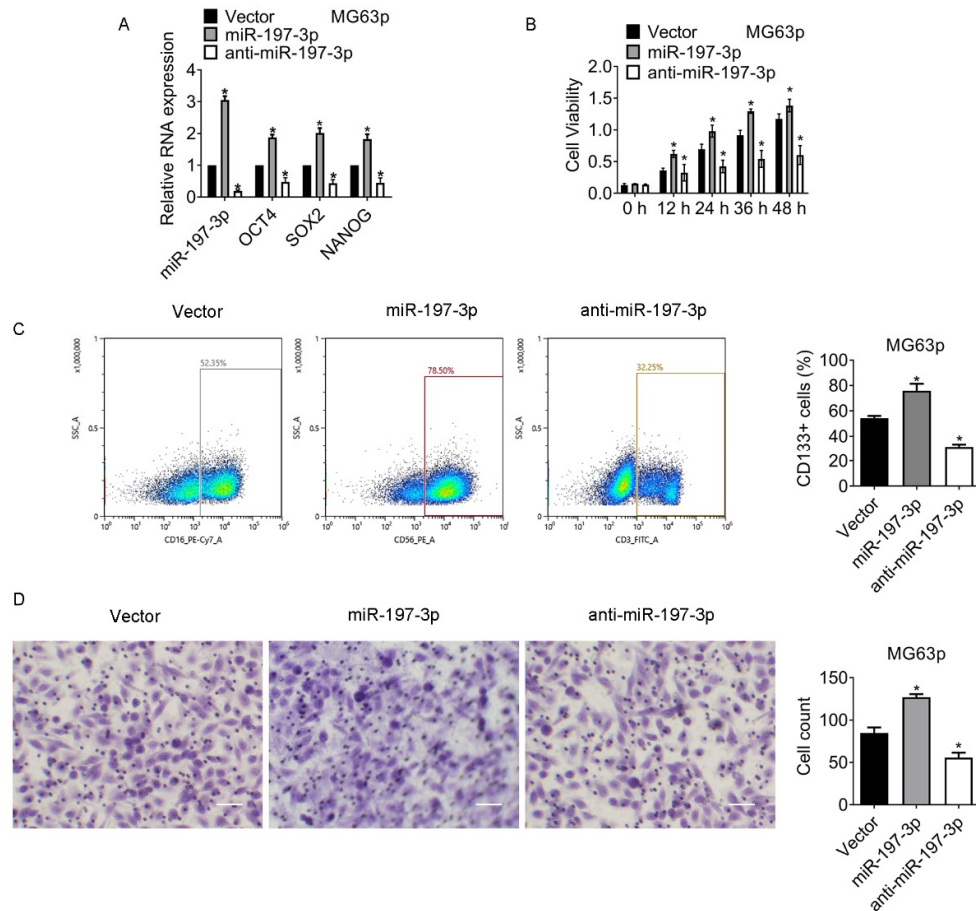

**Supplementary Figure 2. miR-197-3p plays an essential role in maintaining chemoresistance and stemness of osteosarcoma cells MG63p.** (A) The indicated genes expression was examined by qPCR and western blot. (B) The viability of the cells was assessed by MTT assay. (C) The quantity of CD133+ cells was measured by flow cytometry. (D) The migration of the cells was assessed by transwell assay. Magnification, 200x. \* $P < 0.05$ ; NS, no significance. Results represented the mean  $\pm$  S.D. of three independent experiments. MG63p, the parental MG63.

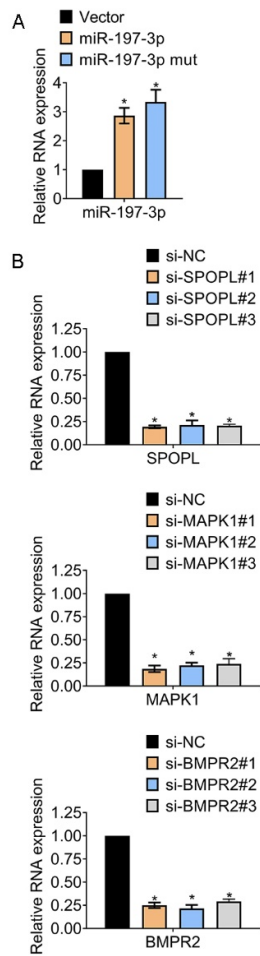

**Supplementary Figure 3. The indicated miRNAs and mRNAs expression was determined by qPCR assay. (A)** The overexpression of miR-197-3p and miR-197-3p mut was detected by qPCR assays. **(B)** The efficacy of silence RNAs was measured by qPCR assay. \* $P < 0.05$ ; NS, no significance. Results represented the mean  $\pm$  S.D. of three independent experiments.

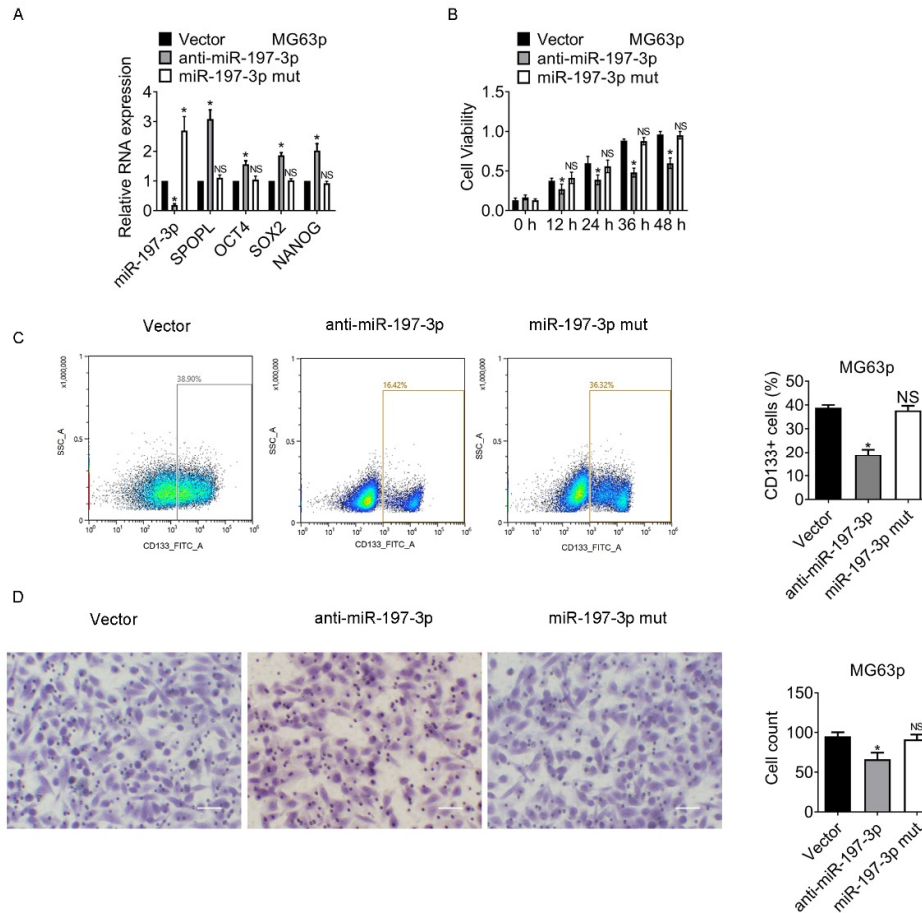

**Supplementary Figure 4. miR-197-3p contributes to MG63 cells' chemoresistance and stemness**

**by inhibiting SPOPL. (A)** The indicated genes expression in the cells was detected by qRT-PCR and

western blot. **(B)** The viability of the cells was assessed by MTT assay. **(C)** The representative images

of CD133+ cells are shown. The CD133+ cells population was measured by flow cytometry. SSC-A

indicates Side Scatter-Area. **(D)** The migration of the cells was assessed by transwell assay.

Magnification, 200x. \* $P < 0.05$ ; NS, no significance. Results represented the mean  $\pm$  S.D. of three

independent experiments. MG63p, the parental MG63.

Table S1. The association of miRNA expression and overall survival

| miRNA       | Overall survival (months) |                 | <i>P</i> values |
|-------------|---------------------------|-----------------|-----------------|
|             | Low expression            | High expression |                 |
| miR-9-3p    | 85.83                     | 48.87           | 0.0029*         |
| miR-17-5p   | 86.63                     | 41.17           | 8.1-e06*        |
| miR-20a-5p  | 86.63                     | 42.07           | 0.00012*        |
| miR-124-3p  | 86.63                     | 47.47           | 0.018*          |
| miR-197-3p  | 54.23                     | 22.93           | 0.000046*       |
| miR-320d    | 77.47                     | 61.5            | 0.44            |
| miR-506-3p  | 81.6                      | 49.27           | 0.13            |
| miR-526b-3p | 81.6                      | 64.7            | 0.16            |

\* Indicates *p* values < 0.05.

Table S2. The primers for detection list below.

|            |                 |                          |
|------------|-----------------|--------------------------|
| miR-197-3p | Sense (5'-3')   | TTCACCACCTTCTCCAC        |
|            | Reverse (5'-3') | GAACATGTCTGCGTATCTC      |
| miR-20a-5p | Sense (5'-3')   | GTGCTTATAGTGCAGGTA       |
|            | Reverse (5'-3') | GAACATGTCTGCGTATCTC      |
| miR-17-5p  | Sense (5'-3')   | TGCTTACAGTGCAGGTAG       |
|            | Reverse (5'-3') | GAACATGTCTGCGTATCTC      |
| SPOPL      | Sense (5'-3')   | TGGTCTTTTACCAGATGACAAGCT |
|            | Reverse (5'-3') | AGACGACACTCAGGCACCTTCA   |
| MAPK1      | Sense (5'-3')   | ACACCAACCTCTCGTACATCGG   |
|            | Reverse (5'-3') | TGGCAGTAGGTCTGGTGCTCAA   |
| BMPR2      | Sense (5'-3')   | AGAGACCCAAGTTCCCAGAAGC   |
|            | Reverse (5'-3') | CCTTTCCTCAGCACACTGTGCA   |
| OCT4       | Sense (5'-3')   | CCTGAAGCAGAAGAGGATCACC   |
|            | Reverse (5'-3') | AAAGCGGCAGATGGTCGTTTGG   |
| SOX2       | Sense (5'-3')   | GCTACAGCATGATGCAGGACCA   |
|            | Reverse (5'-3') | TCTGCGAGCTGGTCATGGAGTT   |
| NANOG      | Sense (5'-3')   | CTCCAACATCCTGAACCTCAGC   |
|            | Reverse (5'-3') | CGTCACACCATTGCTATTCTTCG  |
